# Supplementary material
Source: bioRxiv or medRxiv preprint supplement (https://www.biorxiv.org/highwire/filestream/47694/field_highwire_adjunct_files/0/117994-1.pdf)

# Observations to concepts

Concept

Is it predicted?

Is it expected?

# Observations to concepts

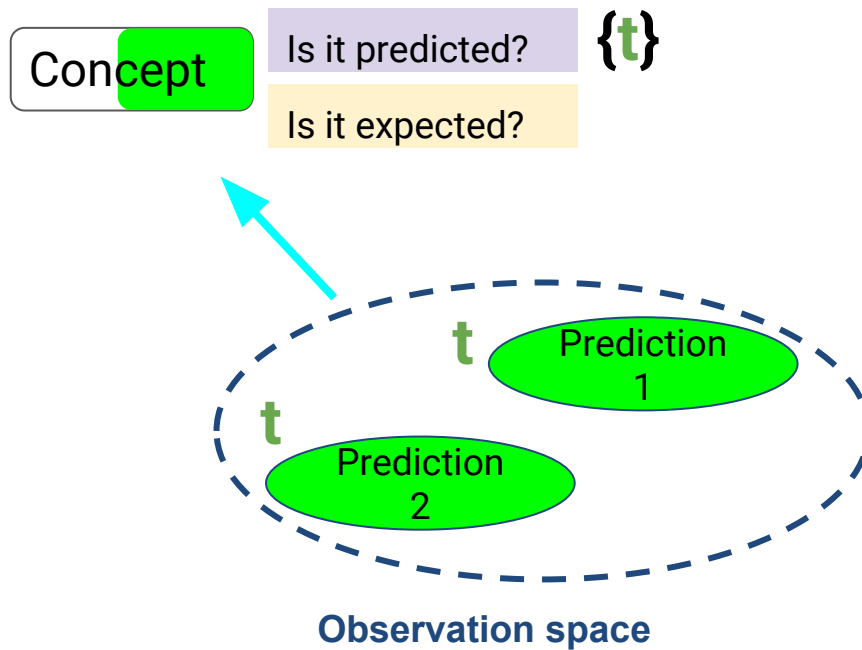

# Observations to concepts

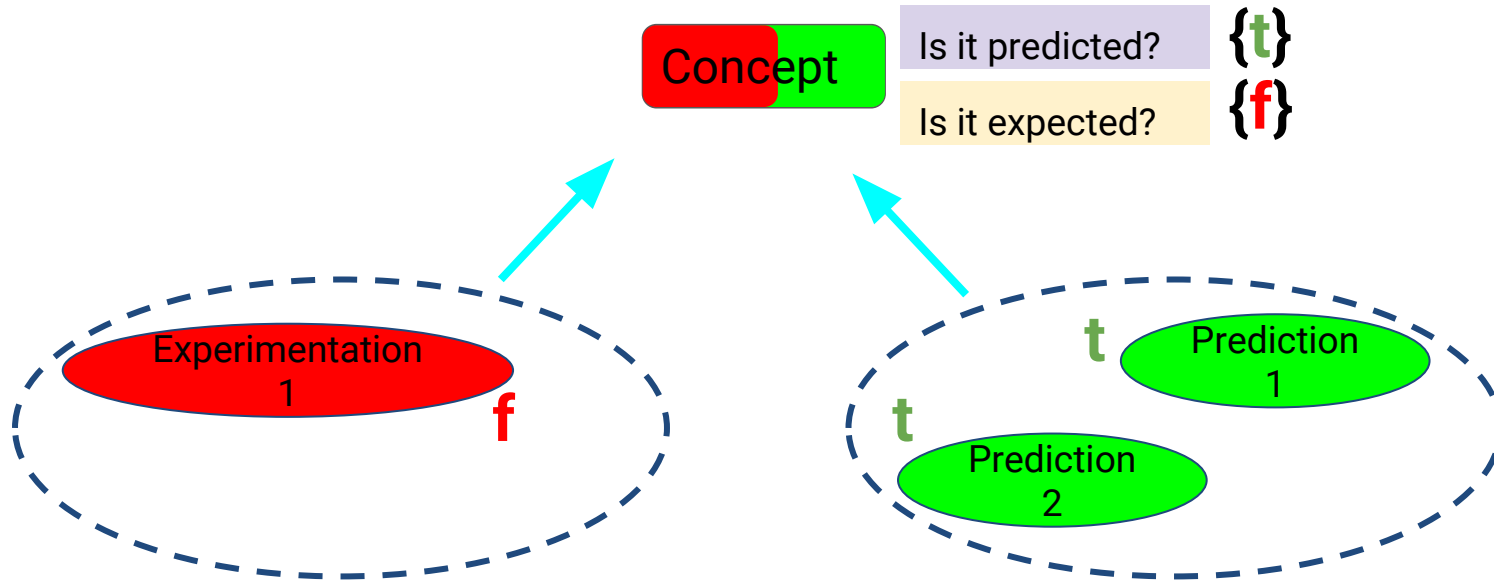

# Observations to concepts

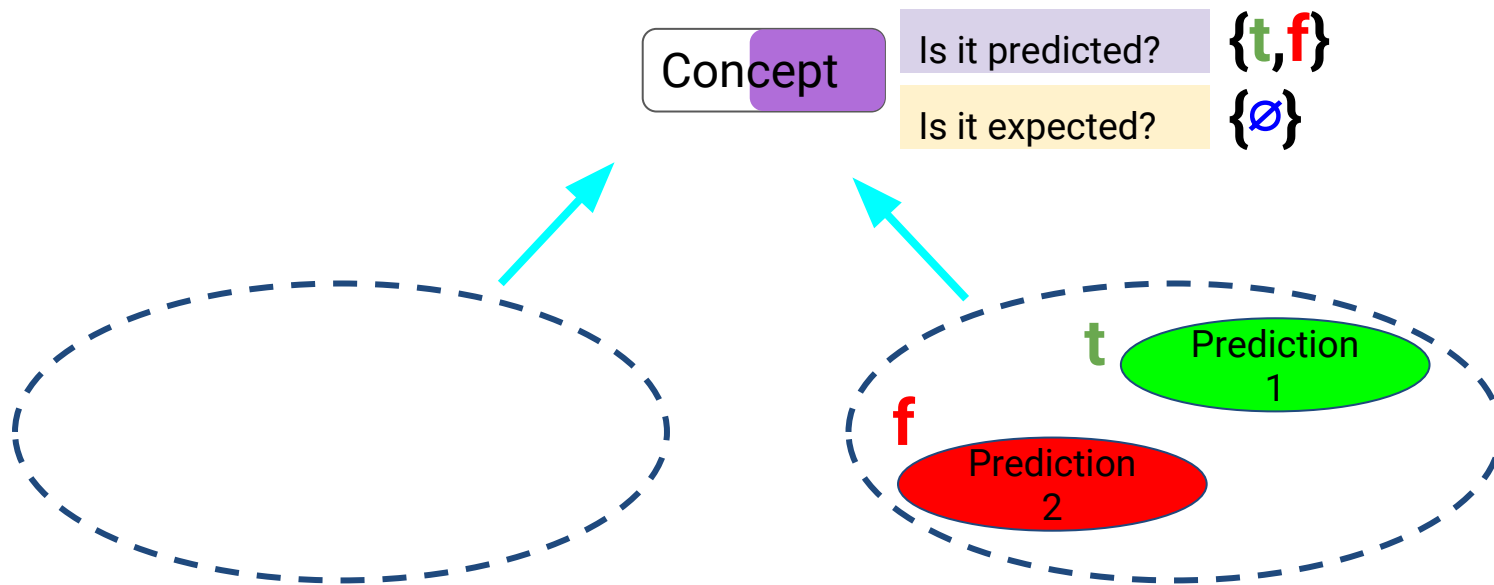

# Propagation rules

**4 rules:** to propagate **predictions** or **expectations** following relation types (**composition** or **generalization/specialisation**)

# Propagation rules

**4 rules:** to propagate **predictions** or **expectations** following relation types (**composition** or **generalization/specialisation**)

Propagation rule for predictions with composition relations

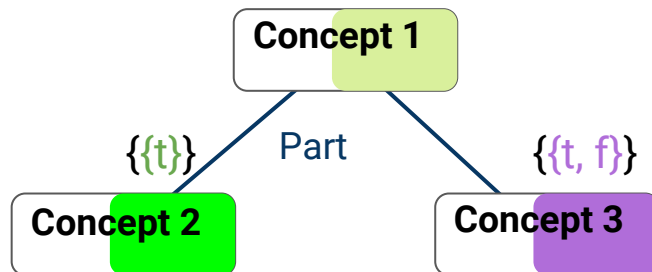

# Propagation rules

**4 rules:** to propagate **predictions** or **expectations** following relation types (**composition** or **generalization/specialisation**)

Propagation rule for predictions with composition relations

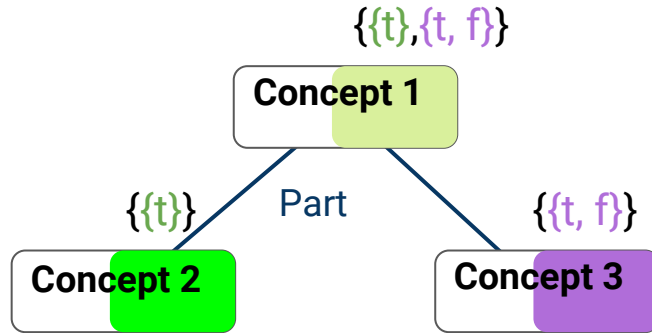

# Propagation rules

**4 rules:** to propagate **predictions** or **expectations** following relation types  
(**composition** or **generalization/specialisation**)

Propagation rule for predictions with generalization/specialisation relations

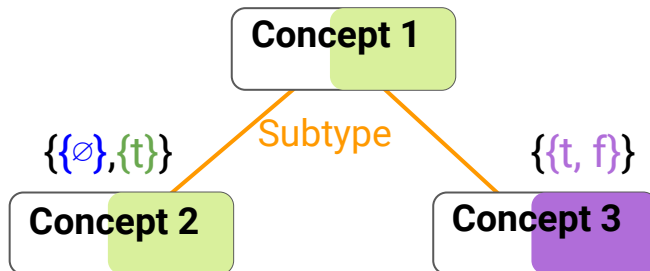



# Propagation rules

**4 rules:** to propagate **predictions** or **expectations** following relation types (**composition** or **generalization/specialisation**)

Propagation rule for predictions with generalization/specialisation relations

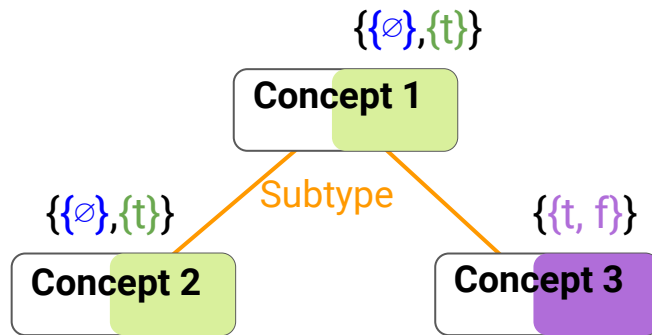

# Reasoning: specific mode

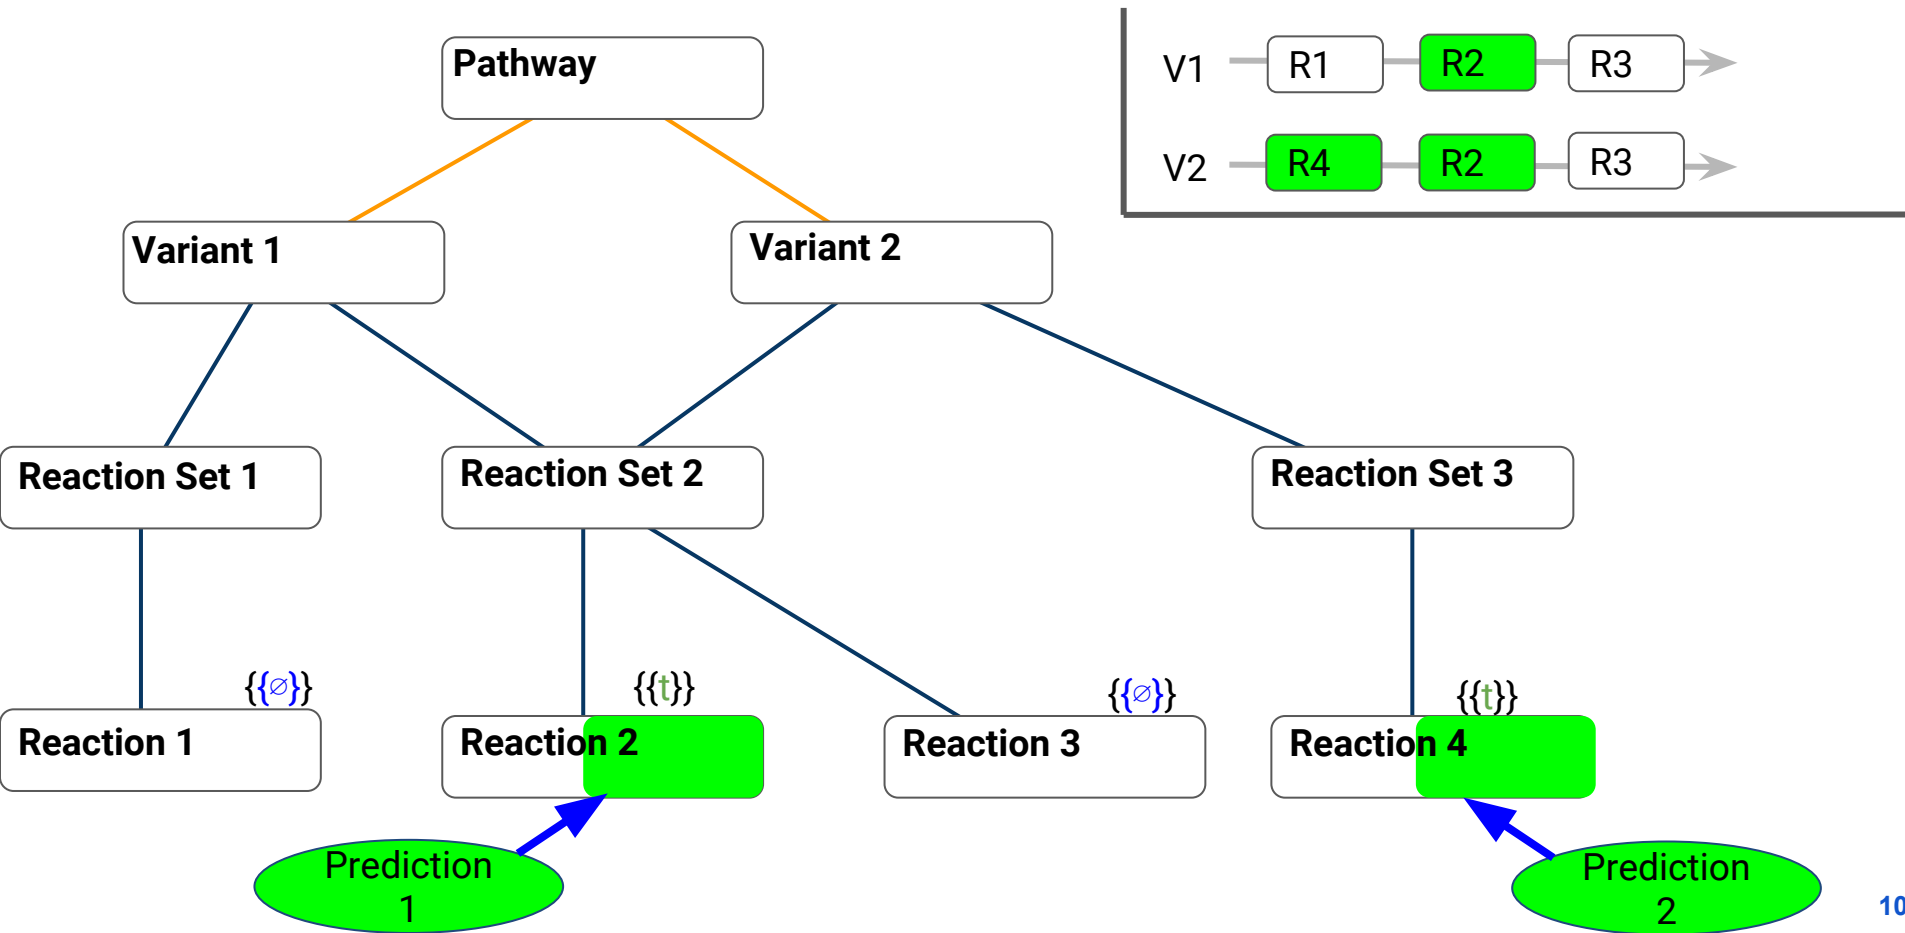

# Reasoning: specific mode

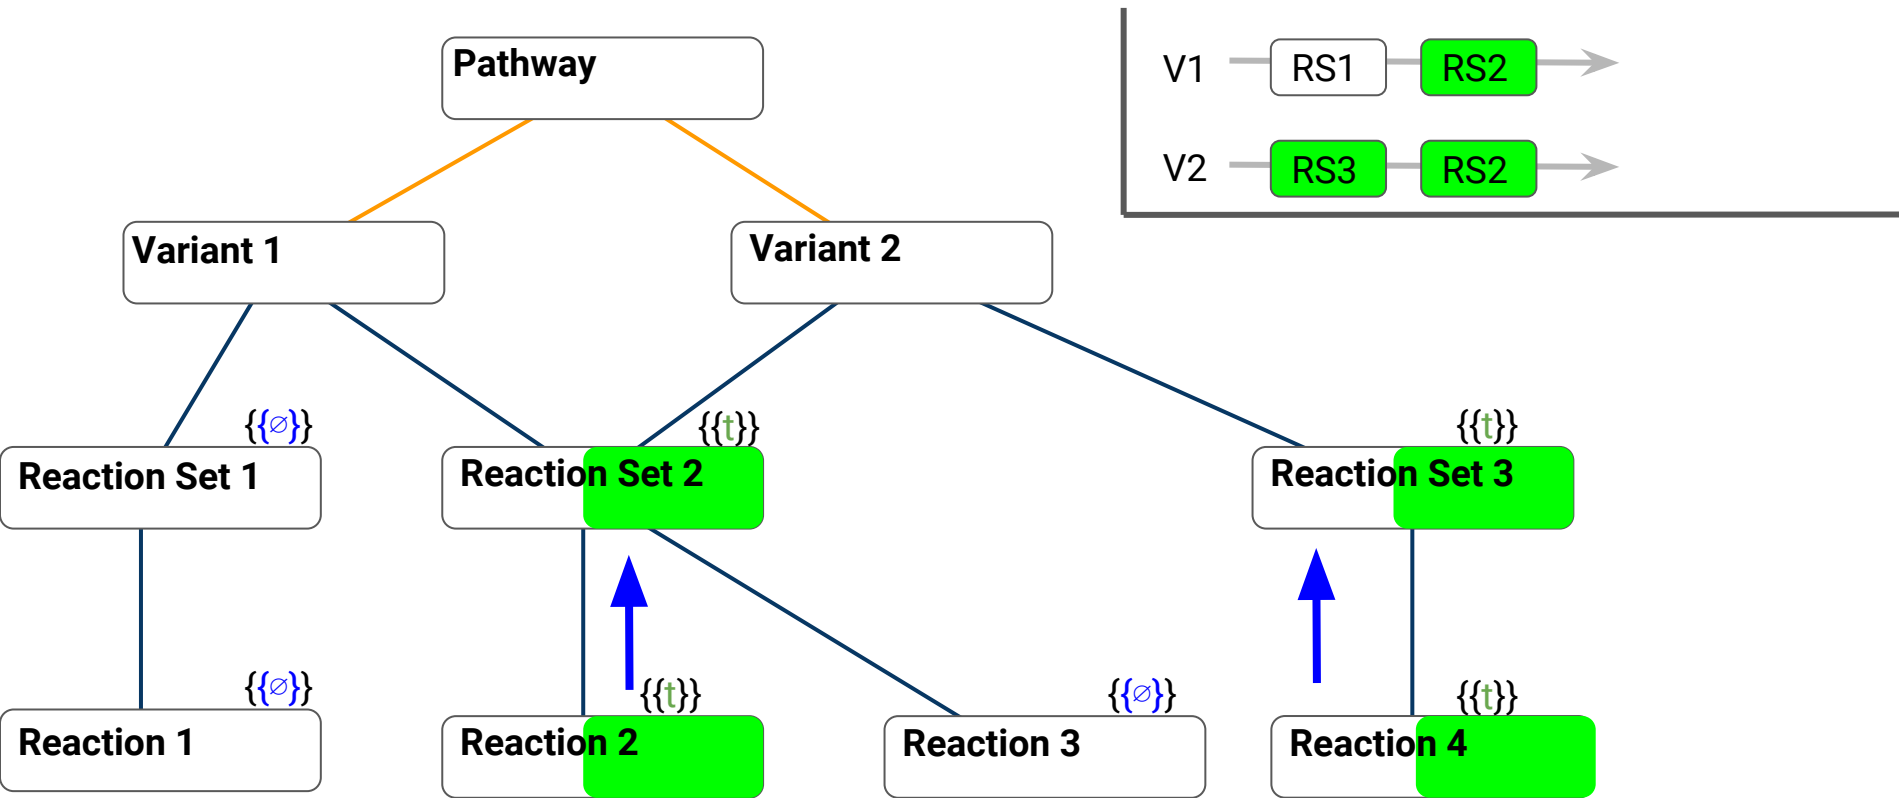

# Reasoning: specific mode

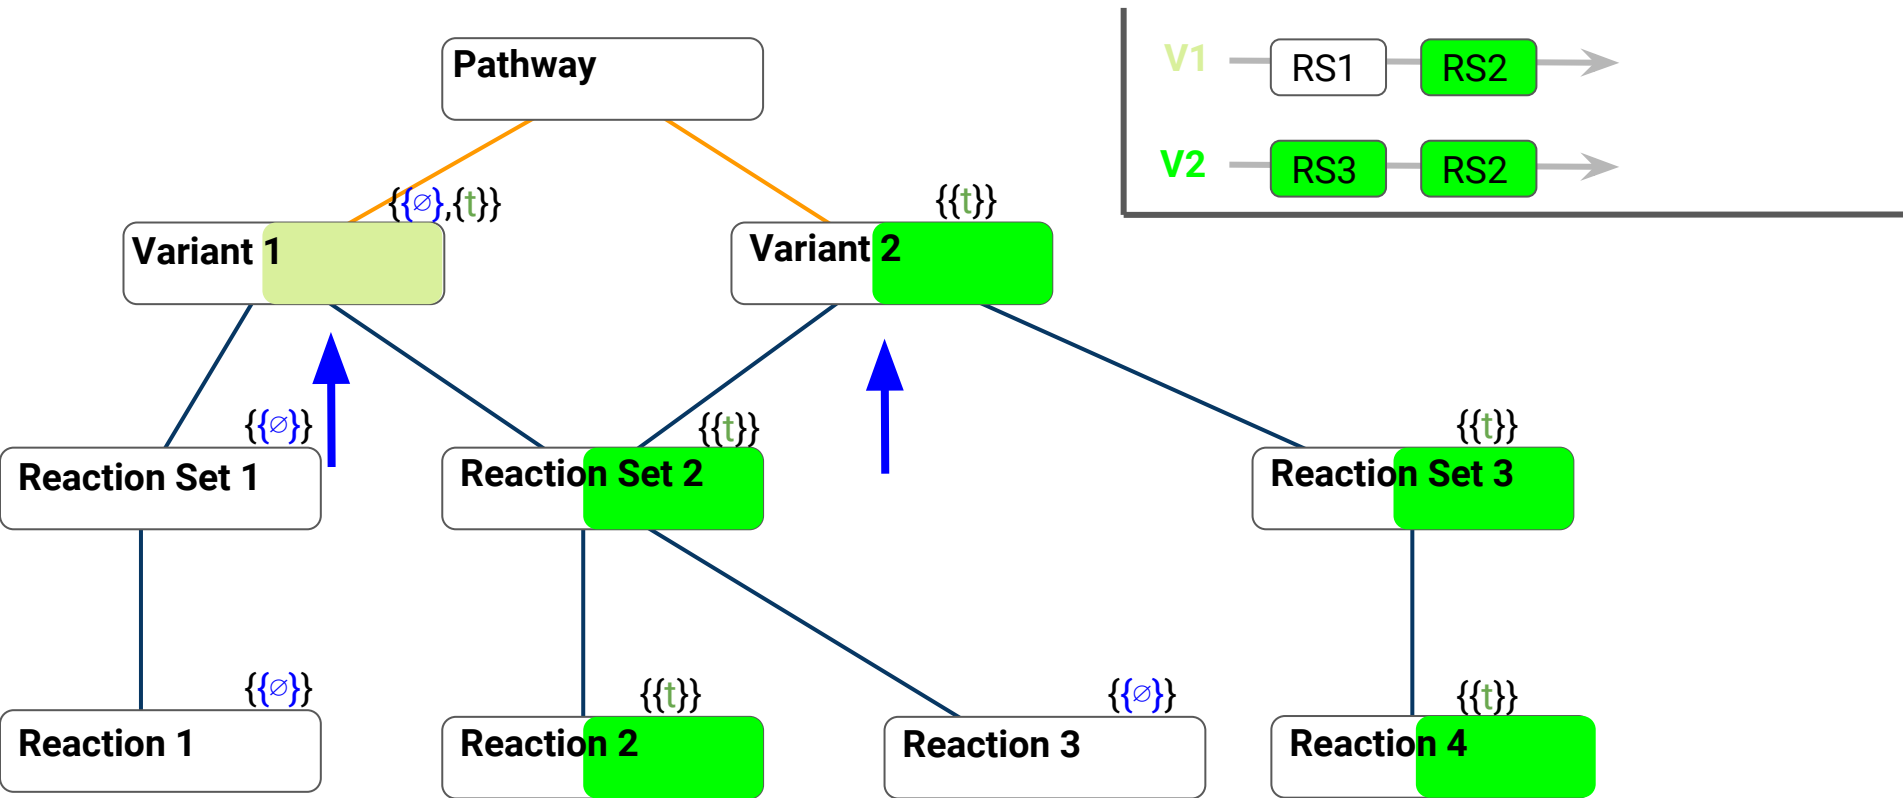

# Reasoning: specific mode

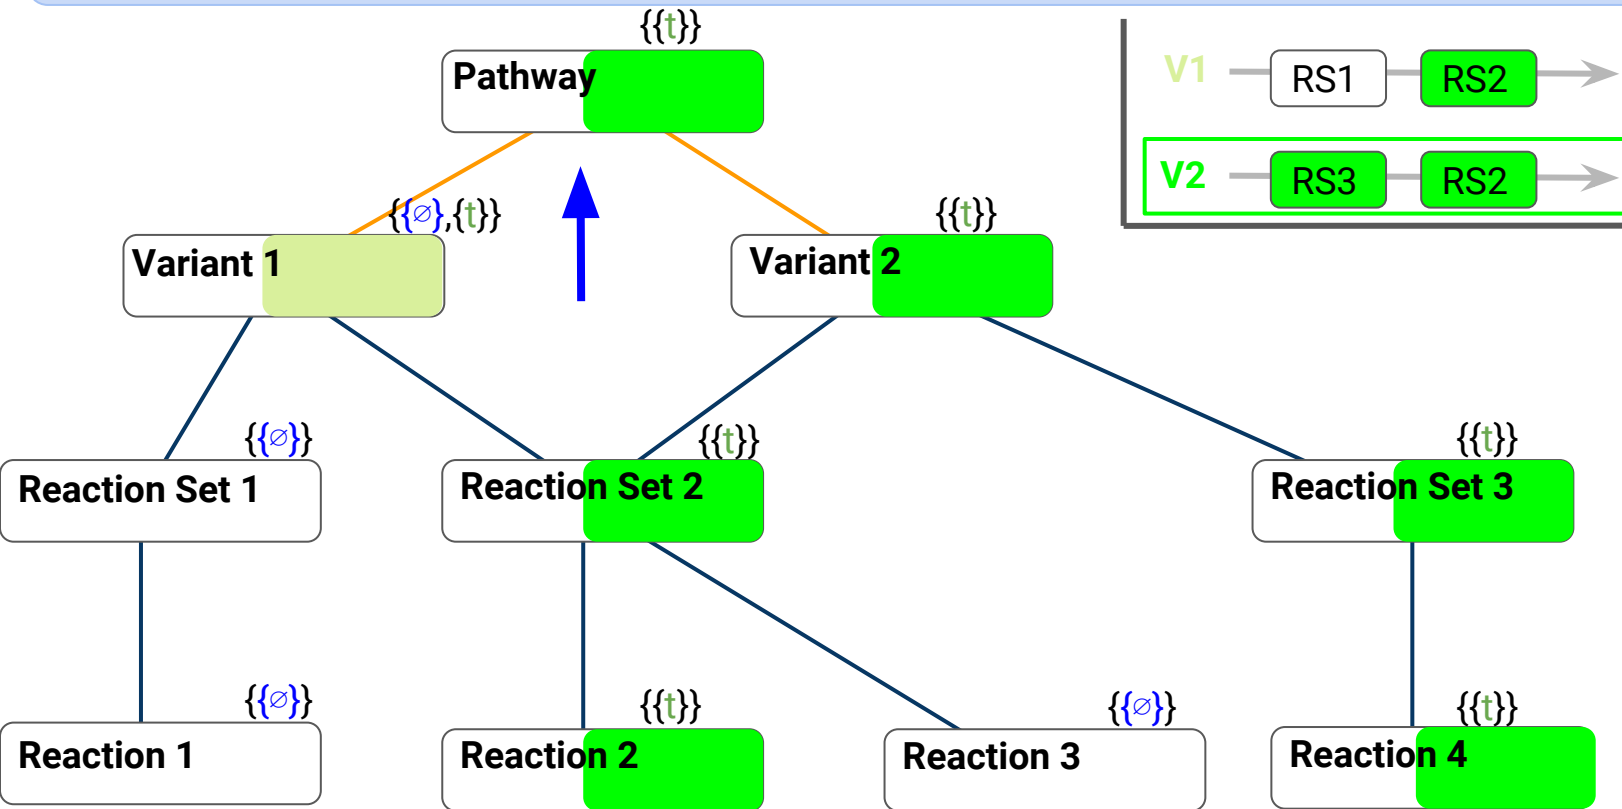

# Reasoning: specific mode

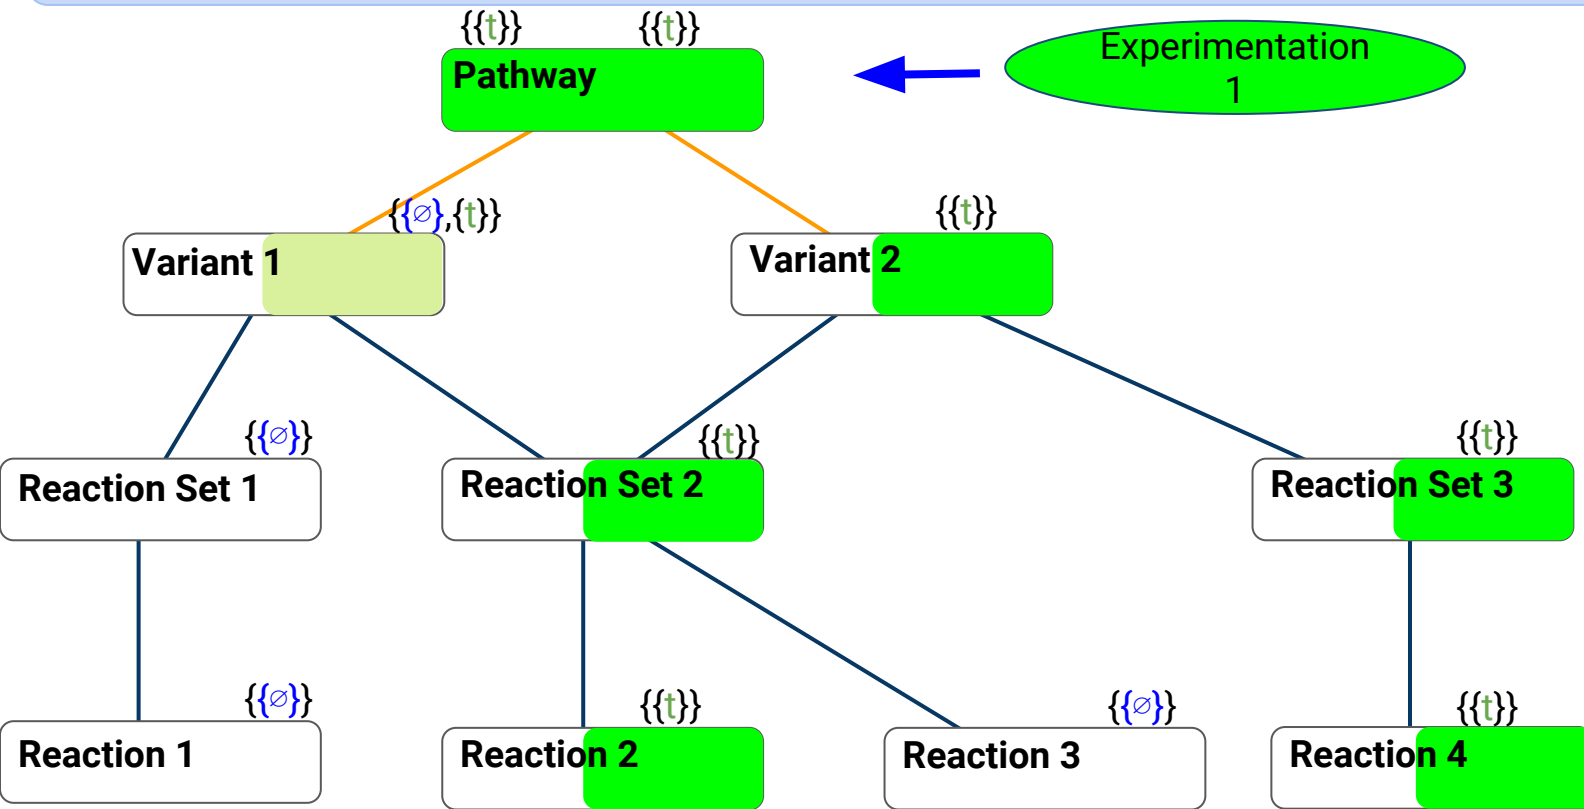



# Reasoning: specific mode

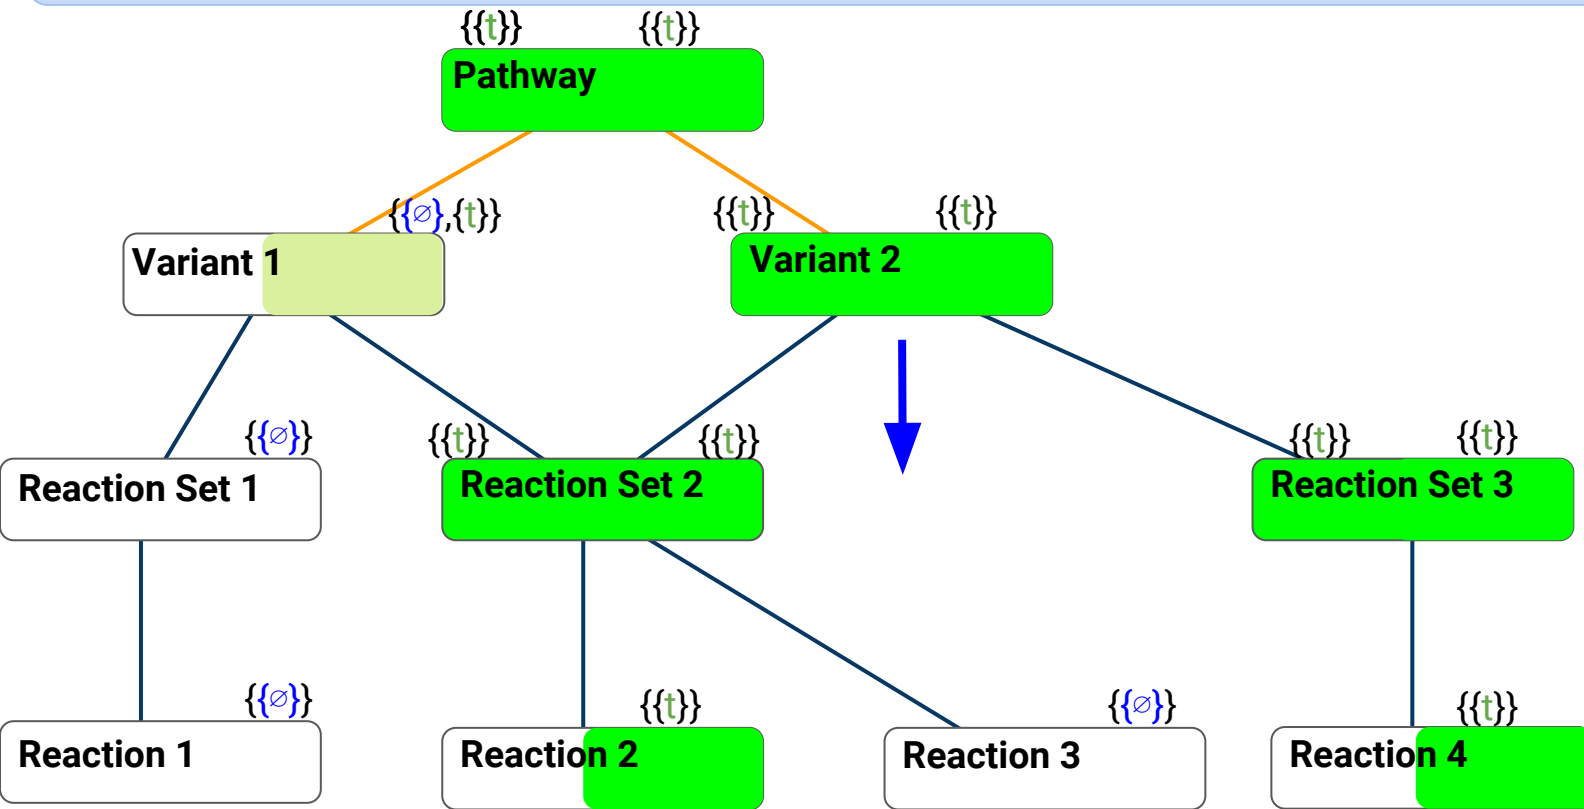



# Reasoning: specific mode

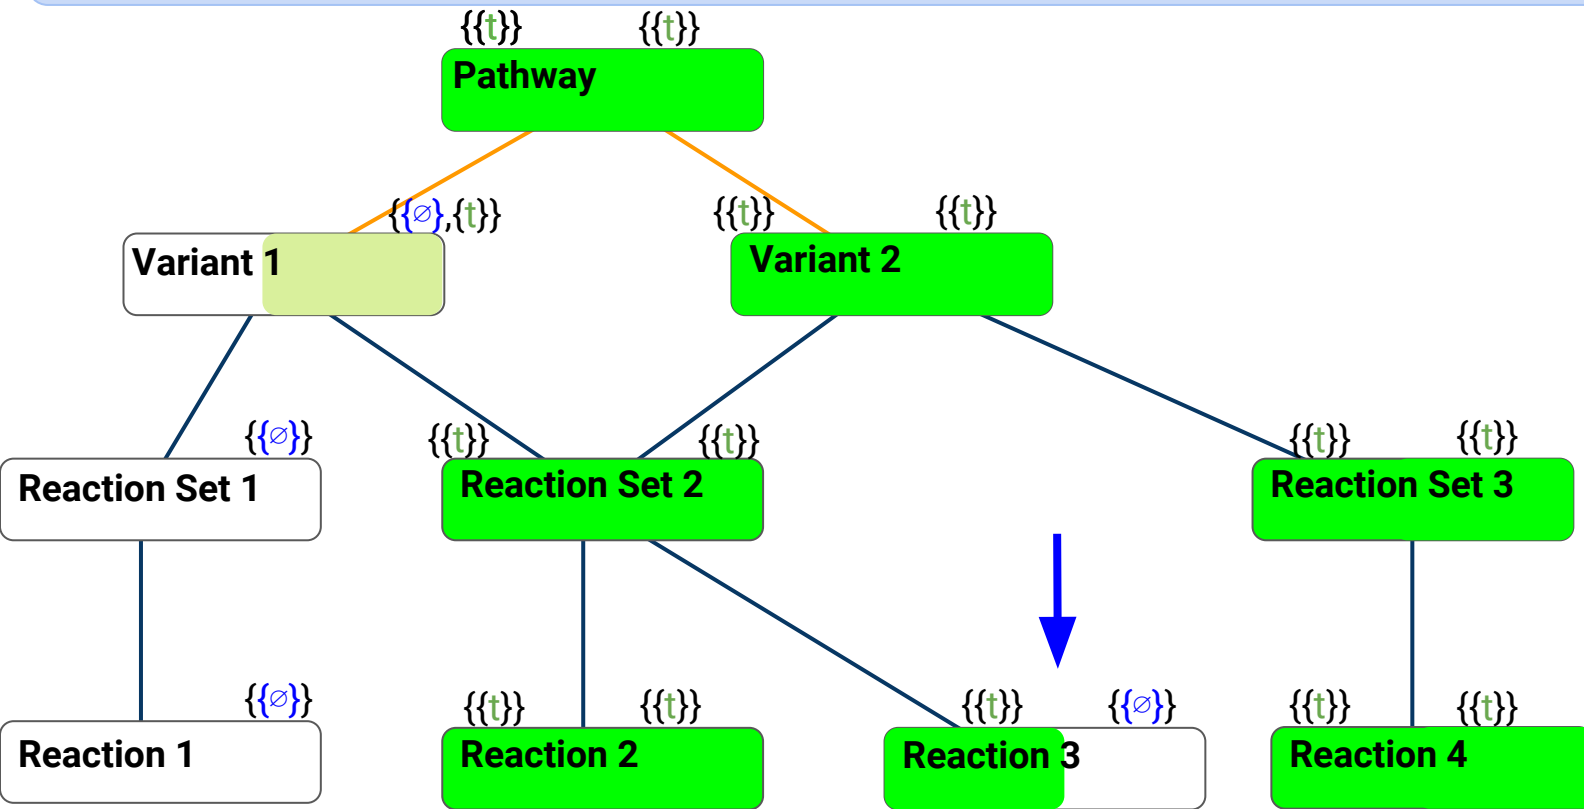

# Reasoning: conclusions

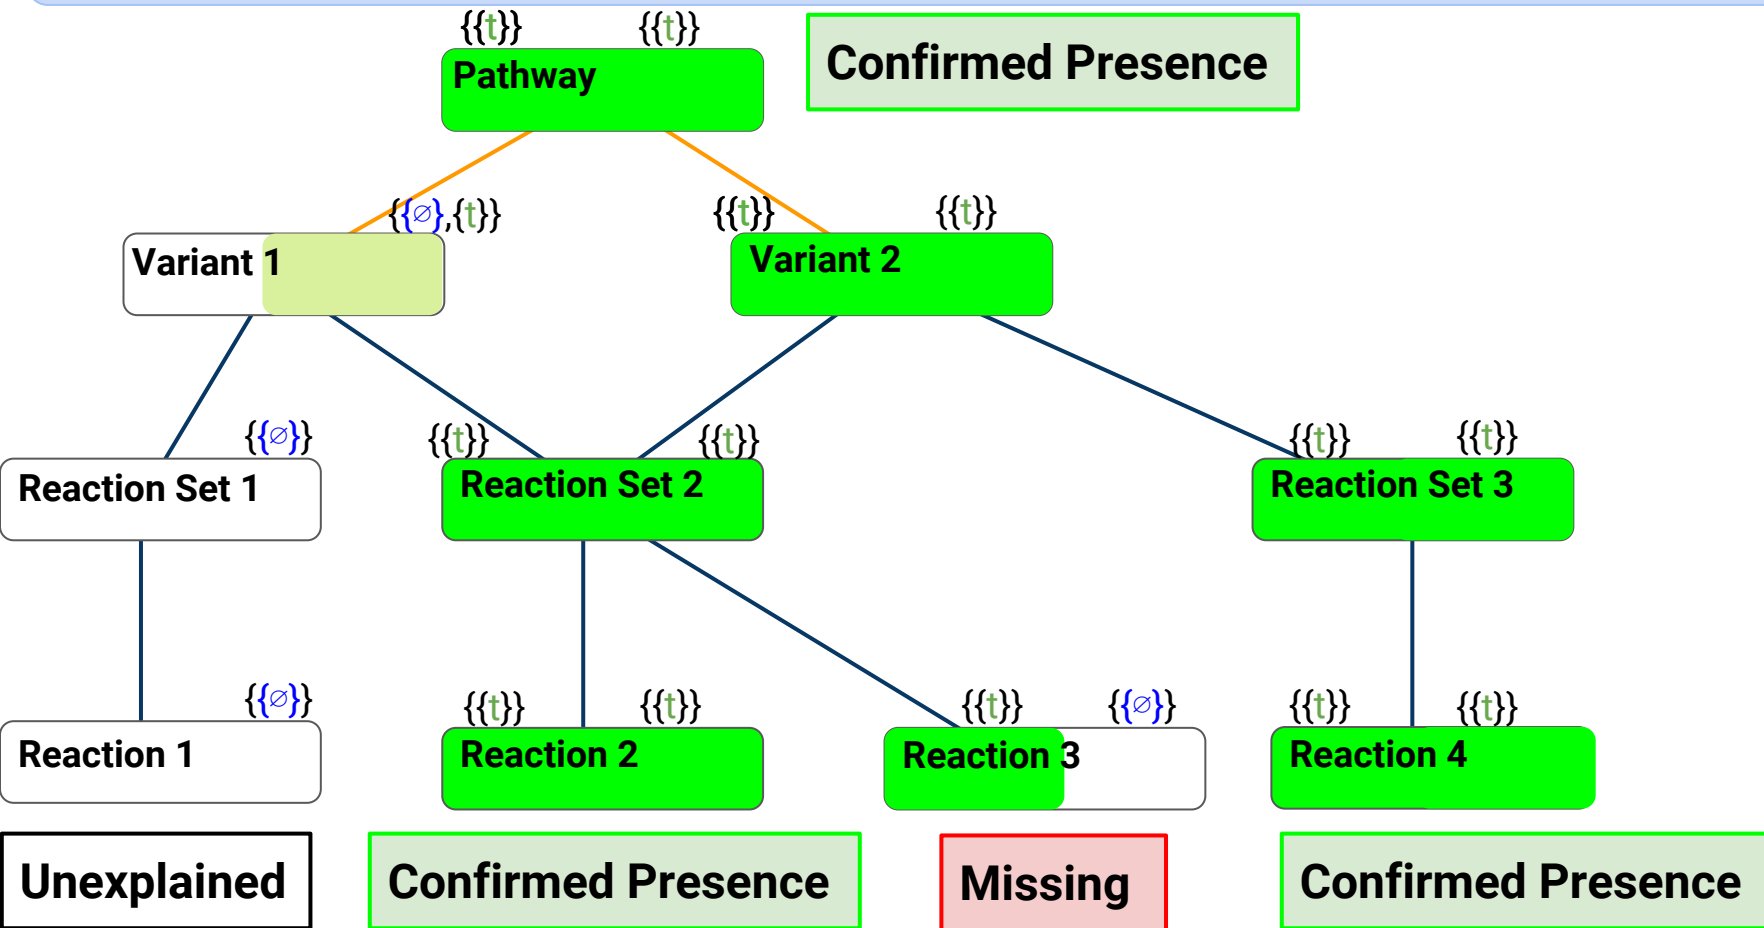

Supplement: Supplementary file [file 117994-1.pdf]
